# Supplementary material
Source: publisher site journal article supplement (https://spandidos-publications.com/5769/downloadSupplementary)

Figure S1. Variation in number of PCs in intestinal mucosa. (Aa-h) Hematoxylin and eosin staining showed PCs in the ileum of WT and dTg mice at 6 and 12 months. (B) Number of PCs, as determined by histochemical staining, in the ileum and colon (n=6/group). Yellow arrow indicates PC. \* $P<0.05$ , \*\* $P<0.01$ . PC, Paneth cell; dTg, double transgene; WT, wild-type.

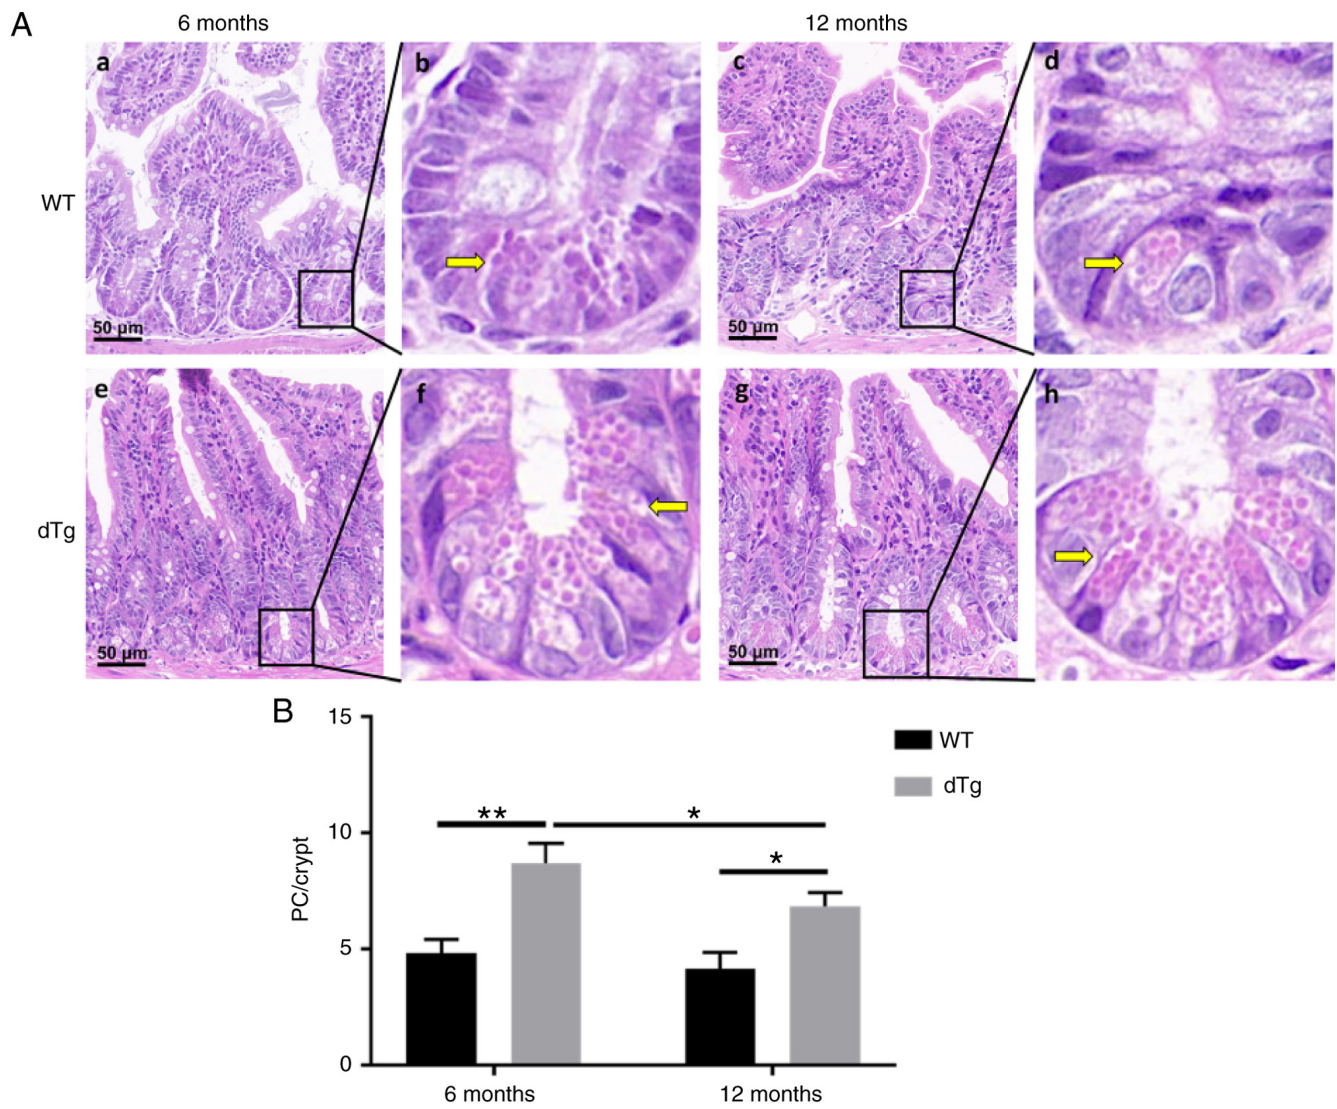

Supplement: Supplementary file 1 [file downloadSupplementary]
